# Supplementary material for: Serological Evidence for Non-Lethal Exposures of Mongolian Wild Birds to Highly Pathogenic Avian Influenza H5N1 Virus
Source: PubMed Central journal article supplement (PMC4266605; doi:10.1371/journal.pone.0113569), 2014-12-15
Supplement: pone.0113569.s001.pdf [file pone.0113569.s001.pdf]

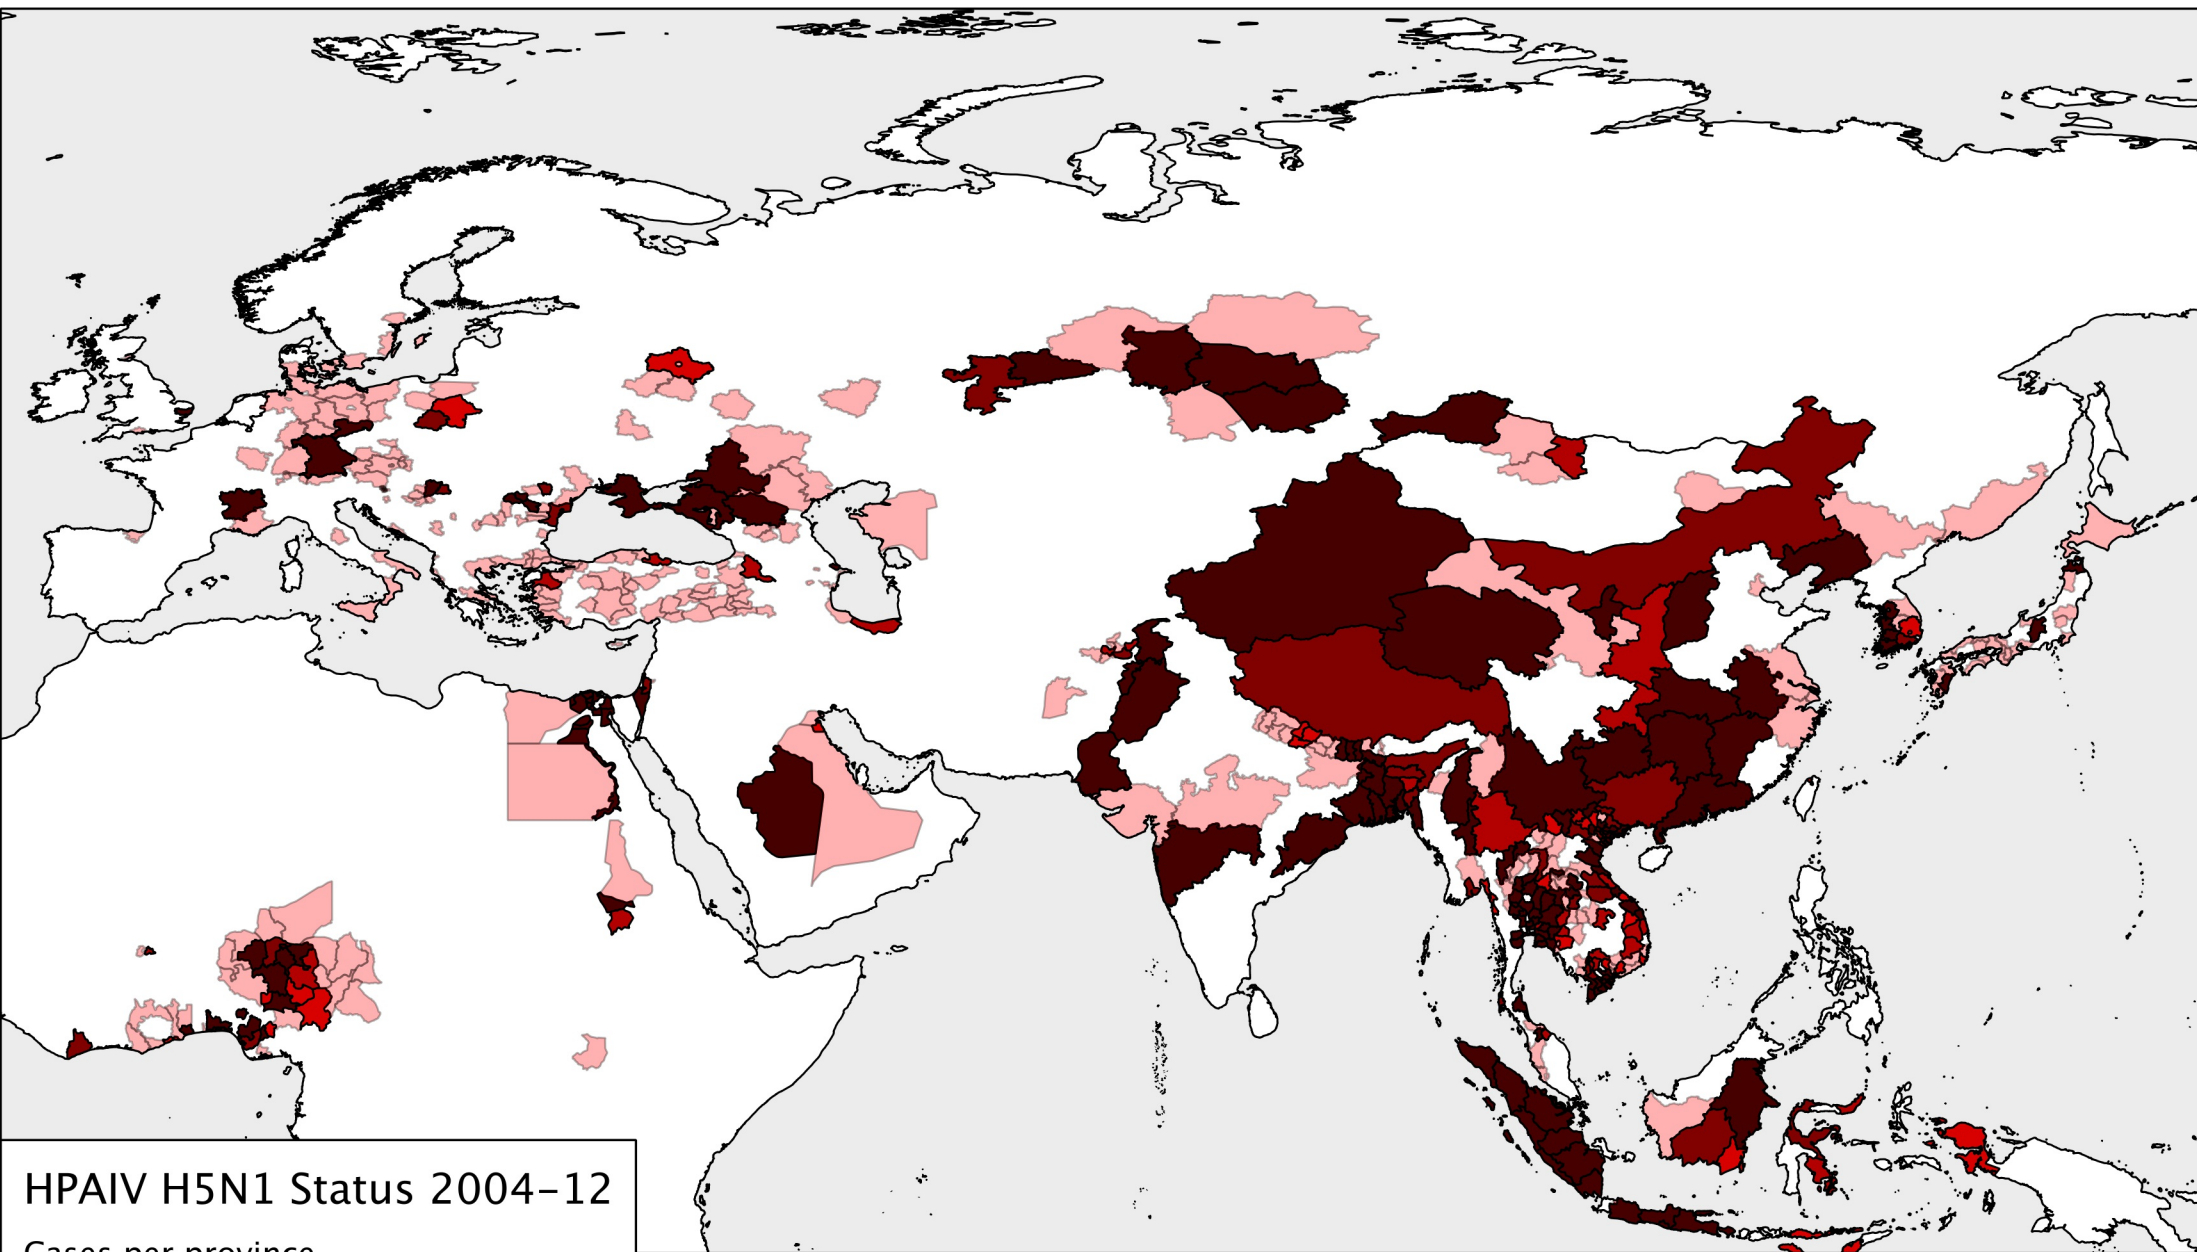

**HPAIV H5N1 Status 2004-12**

Cases per province

- 1-624
- 625-1,249
- 1,250-2,499
- 2,500-4,999
- >5,000

Figure S1. Distribution of domestic and wild bird cases of highly pathogenic avian influenza H5N1 viruses of the Goose/Guangdong/96 H5 lineage reported between January 2004 and February 2012. Data compiled using the Food and Agriculture Organization of the United Nations' Global Animal Disease Information System, EMPRES-i (<http://empres-i.fao.org/eipws3g/> Accessed 11 February 2014). Political areas equivalent to state/province level are shaded according to the number of domestic and wild bird cases reported.
